# Supplementary material for: Maternal Vegetable and Fruit Consumption during Pregnancy and Its Effects on Infant Gut Microbiome
Source: MDPI journal article supplement (doi:10.3390/nu13051559), 2021-05-05
Supplement: s1 [file s1]

**Maternal Vegetable and Fruit Consumption During Pregnancy and Its Effects on Infant Gut Microbiome**

**Hsien-Yu Fan, Yu-Tang Tung, Yu-Chen Yang, Justin BoKai Hsu, Cheng-Yang Lee,  
Tzu-Hao Chang, Chia-Yu Su, Rong-Hong Hsieh, Yang Ching Chen**

**Supplemental figures**

**Figure S1. Flowchart of participant recruitment..... 1**

**Figure S2. Alpha diversity of the infant gut microbiome according to maternal vegetable and fruit consumption during pregnancy .....2**

**Figure S3. Variations in the infant gut microbiome are not explained by other potential confounders .....3**

**Figure S4. Relationship of intake of food from specific food groups to the abundance of specific gut microbiota.....5**

**Figure S1. Flowchart of participant recruitment**

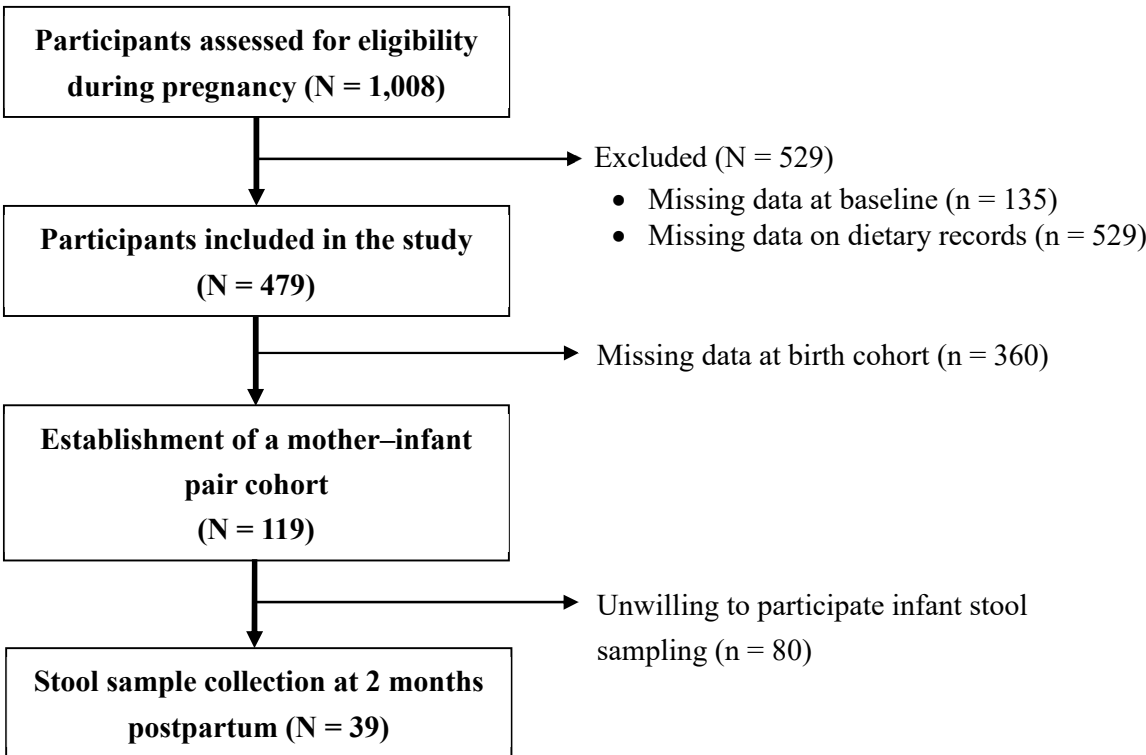

Figure S2. Alpha diversity of the infant gut microbiome according to maternal vegetable and fruit consumption during pregnancy

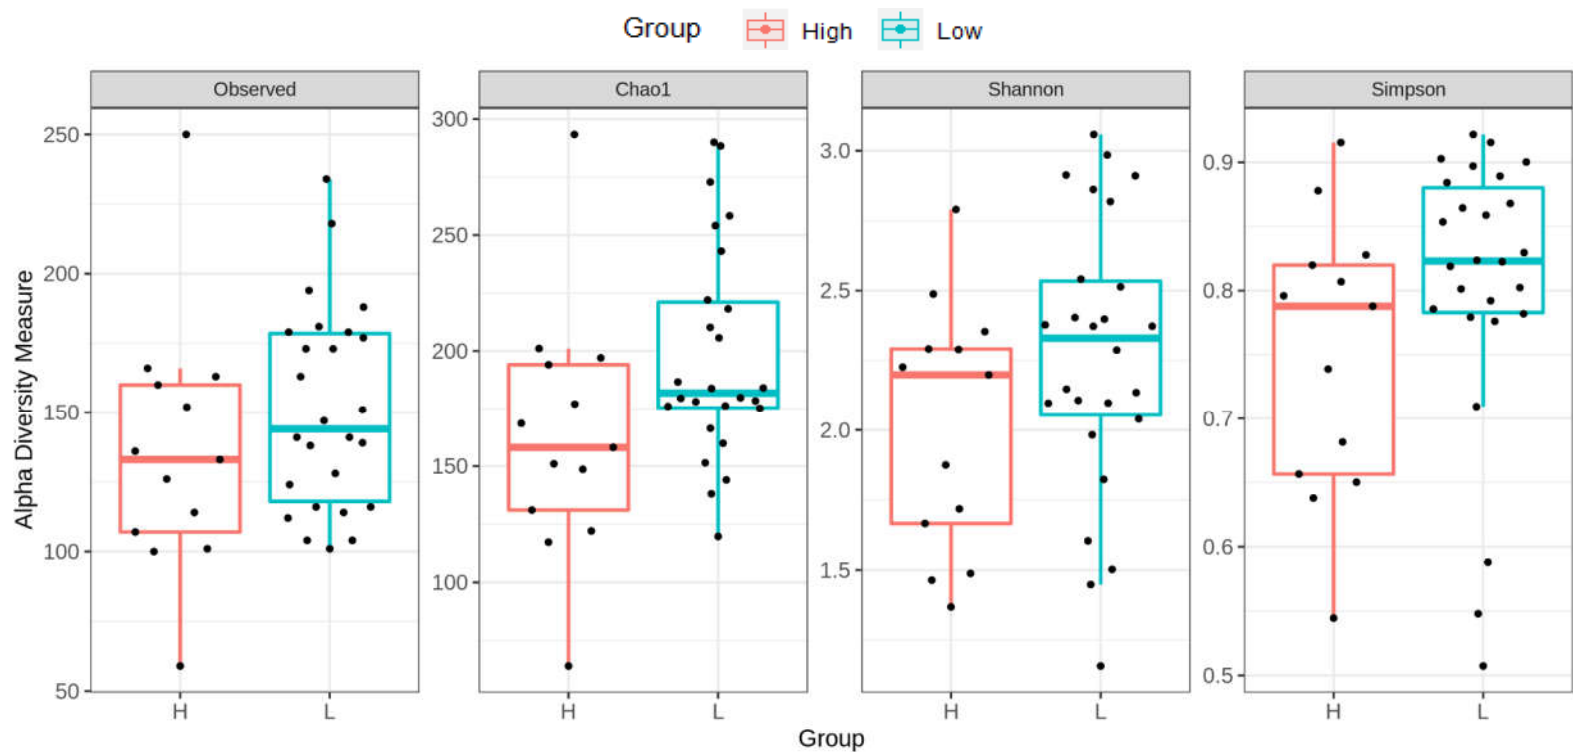

\*High consumption was defined as one or more cups of fruits or vegetables per day.

**Figure S3. Variations in the infant gut microbiome are not explained by other potential confounders**

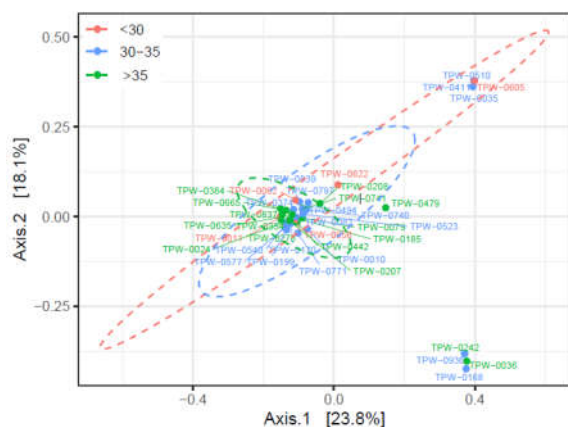

Adonis P = 0.43; Betadisper P = 0.69

**(A) Age (years)**

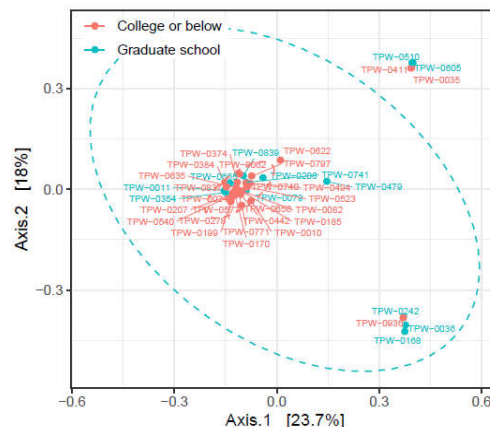

Adonis P = 0.05; Betadisper P = 0.06

**(B) Education level**

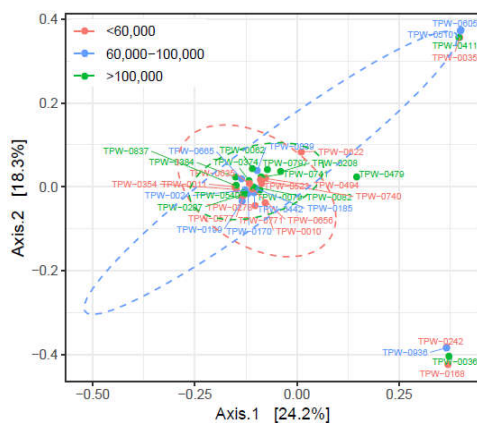

Adonis P = 0.85; Betadisper P = 0.96

**(C) Family income (NTS)**

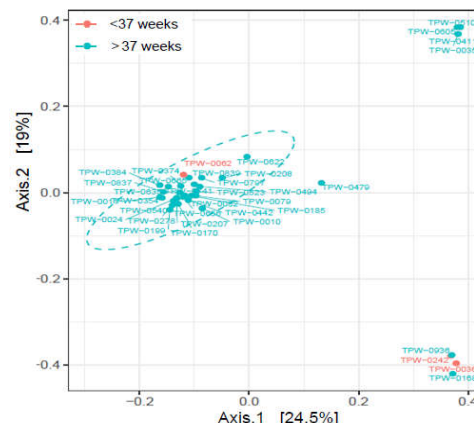

Adonis P = 0.05; Betadisper P = 0.25

**(D) Gestational age (weeks)**

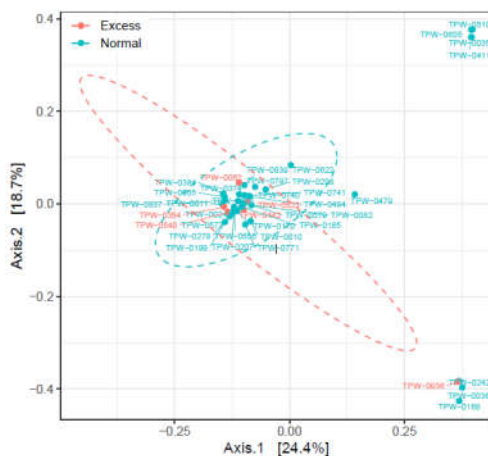

Adonis P = 0.70; Betadisper P = 0.33

**(E) Excess gestational weight gain**

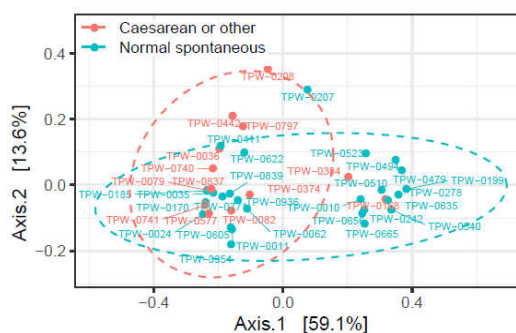

Adonis P = 0.33; Betadisper P = 0.26

**(F) Delivery mode**

**Figure S3. Variations in the infant gut microbiome are not explained by other potential confounders (continued)**

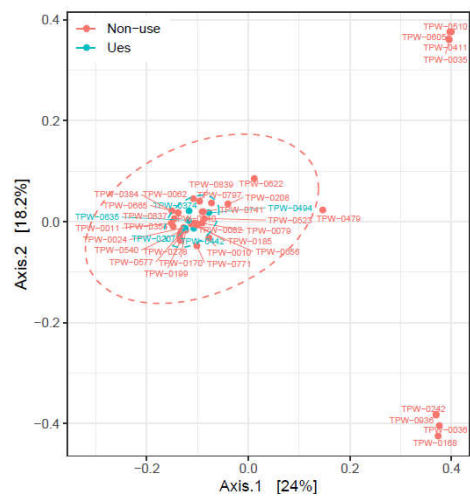

Adonis P = 0.36; Betadisper P = 0.06

**(G) Antepartum antibiotics**

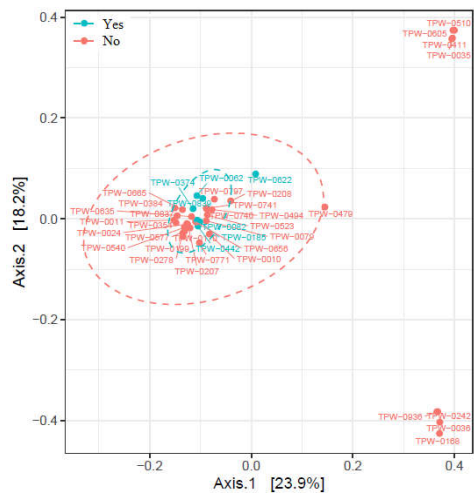

Adonis P = 0.28; Betadisper P = 0.01

**(H) Group B streptococcus positive**

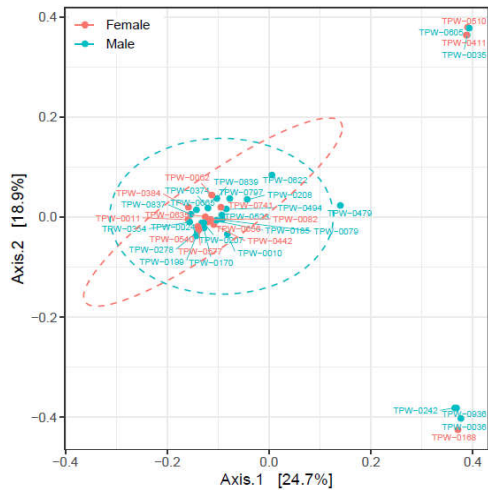

Adonis P = 0.95; Betadisper P = 0.57

**(I) Neonatal sex**

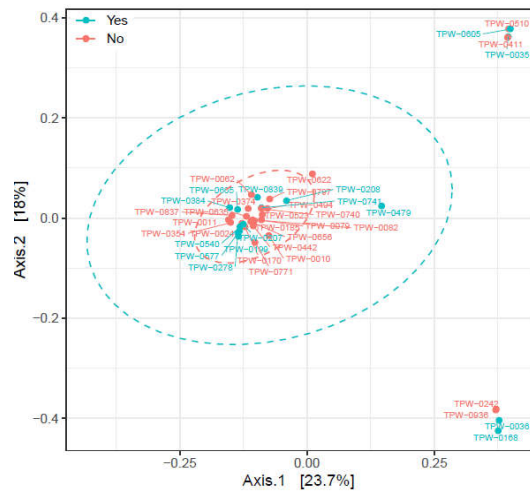

Adonis P = 0.77; Betadisper P = 0.16

**(J) Breastfeeding**

**Figure S4. Relationship of intake of food from specific food groups to the abundance of specific gut microbiota**

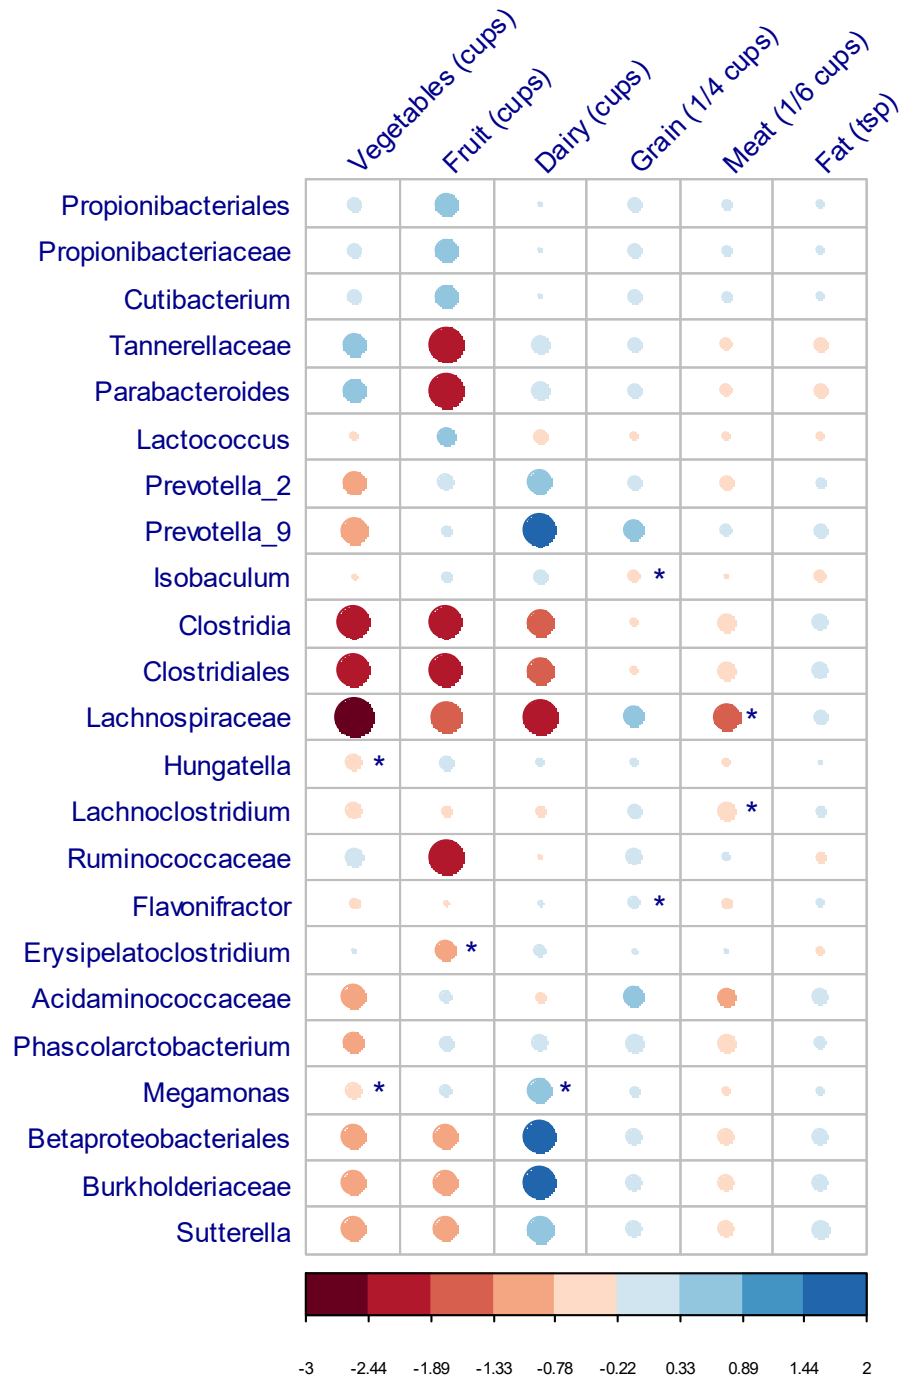

One cup = 240 mL; tbsp = tablespoon (5 mL).

\*Asterisk indicates significant association
